# Supplementary material for: Effect of Knocking Down the Insulin Receptor on Mouse Rod Responses
Source: PubMed Central journal article supplement — Sci Rep. 2015 Jan 19;5:7858. doi: 10.1038/srep07858 (PMC4297982; doi:10.1038/srep07858), 2015-01-19
Supplement: srep07858-s1.pdf [file srep07858-s1.pdf]

# Effect of Knocking Down the Insulin Receptor on Mouse Rod Responses

Michael L. Woodruff<sup>§</sup>, Ammaji Rajala<sup>¶</sup>, Gordon L. Fain<sup>§#</sup>, Raju V. S. Rajala<sup>¶§1</sup>,

From the <sup>§</sup>Department of Integrative Biology and Physiology, University of California Los Angeles, Los Angeles, California, 90095-7239, the Departments of <sup>¶</sup>Ophthalmology, <sup>§</sup>Physiology and <sup>1</sup>Cell Biology, University of Oklahoma Health Sciences Center, Oklahoma City, Oklahoma 73104, and the <sup>#</sup>Department of Ophthalmology and Jules Stein Eye Institute, University of California Los Angeles, Los Angeles, California, 90095-7000.

## Supplementary Figure 1:

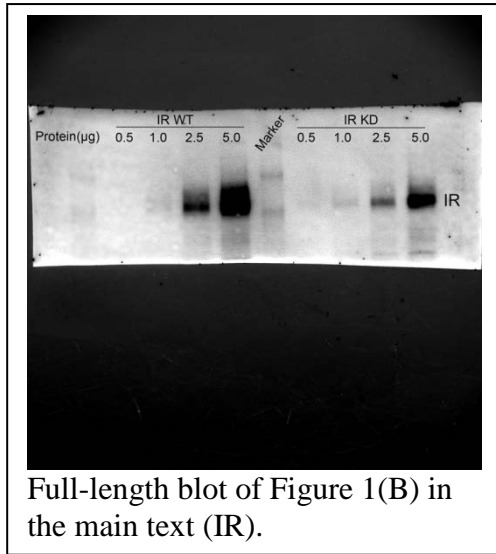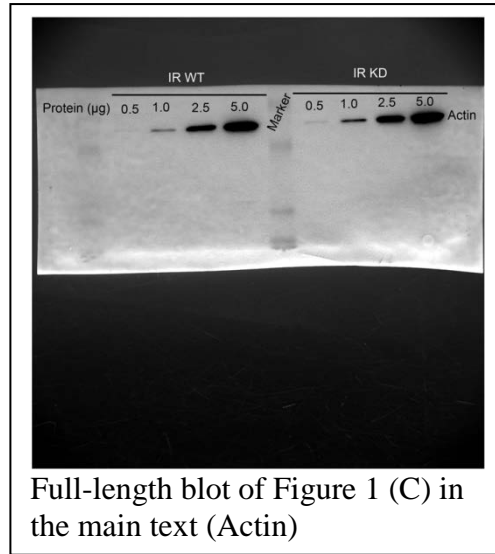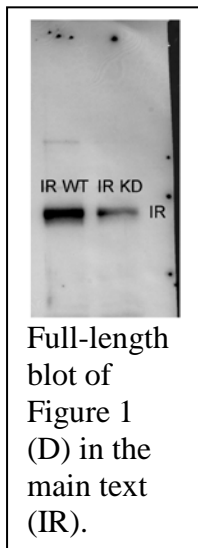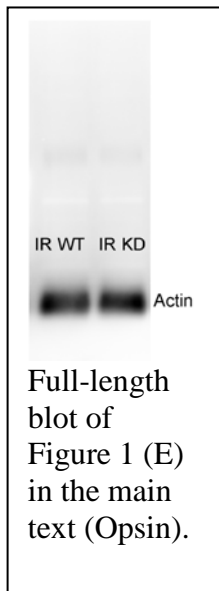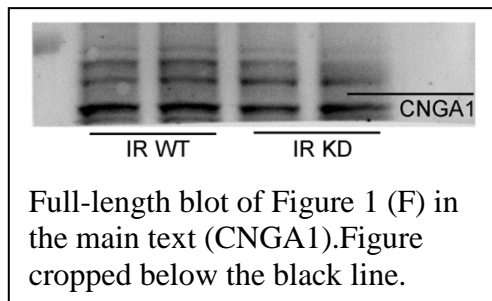

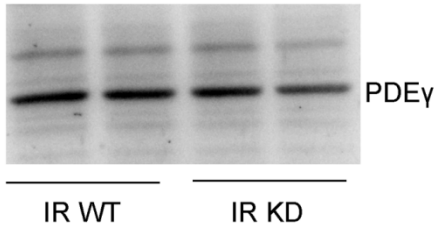

Full-length blot of Figure 1 (G) in the main text (PDE $\gamma$ ).

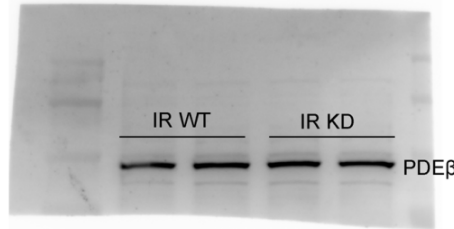

Full-length blot of Figure 1 (H) in the main text (PDE $\beta$ ).

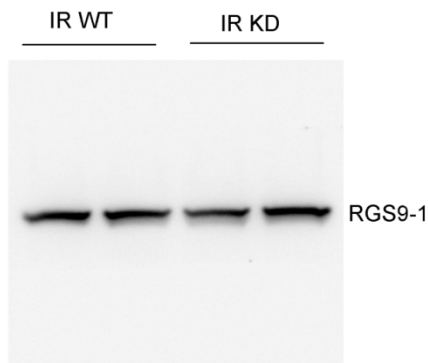

Full-length blot of Figure 1 (I) in the main text (RGS9-1).

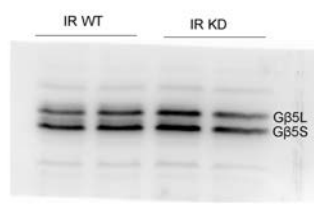

Full-length blot of Figure 1 (J) in the main text (G $\beta$ 5L and G $\beta$ 5S).

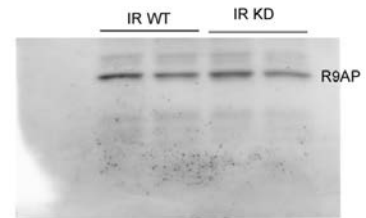

Full-length blot of Figure 1 (K) in the main text (R9AP).

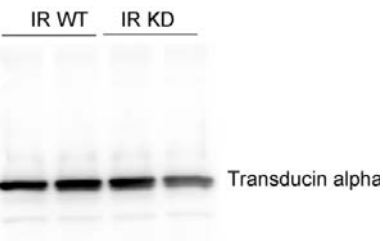

Full-length blot of Figure 1 (L) in the main text (Transducin alpha).

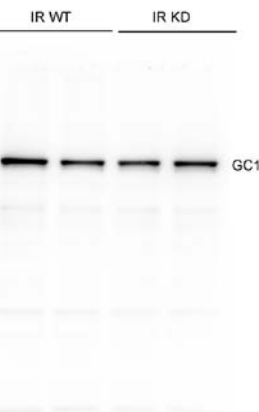

Full length blot of Figure 1 (M) in the main text (GC1).

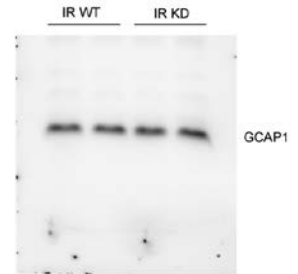

Full-length blot of Figure 1 (N) in the main text (GCAP1).

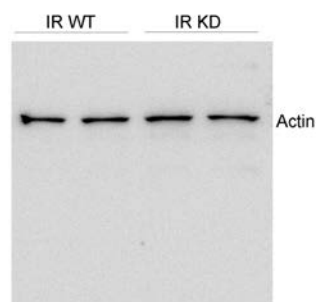

Full length blot of Figure 1 (O) in the main text (Actin).

**Supplementary Figure 2:**

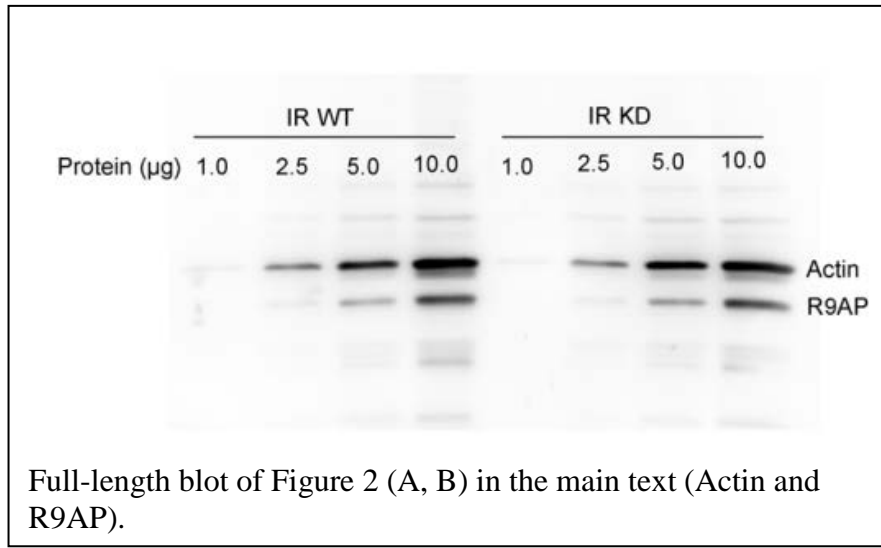

Full-length blot of Figure 2 (A, B) in the main text (Actin and R9AP).

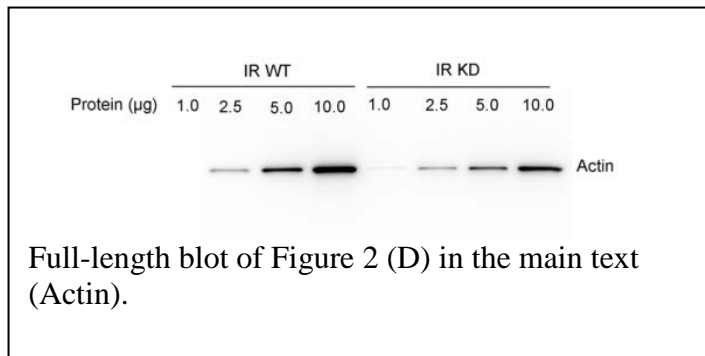

Full-length blot of Figure 2 (D) in the main text (Actin).

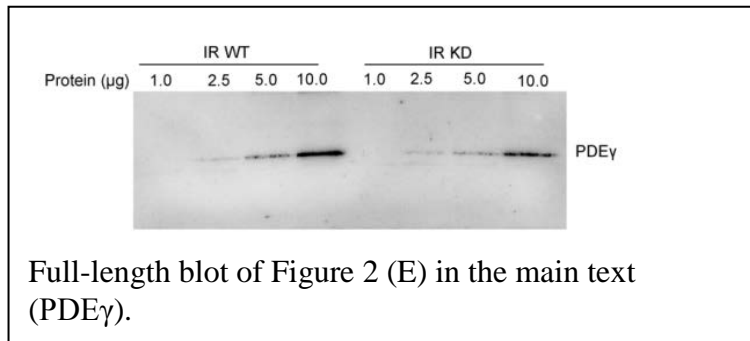

Full-length blot of Figure 2 (E) in the main text (PDE $\gamma$ ).
